# Supplementary material for: Alcohol Hangover Does Not Alter the Application of Model-Based and Model-Free Learning Strategies
Source: J Clin Med. 2020 May 13;9(5):1453. doi: 10.3390/jcm9051453 (PMC7290484; doi:10.3390/jcm9051453)
Supplement: Supplementary file 1 [file jcm-09-01453-s001.zip › Supplements/HANGOVER_AlcoholCalculation_and_Documentation_for_single_subject.xlsx]

## Sheet: Tabelle1
DRINKS			consumption table (for documentation & keeping track)
Please enter values			time	what	amount / ml	brandy reduction	wine reduction	Alcohol left	in brandy left	in red wine left
Sex (f/m)	m			brandy		0	0	127.041	441.116	1671.6
height in cm	180			PLEASE CHOOSE		0	0	127.041	441.116	1671.6
weight in kg	85			PLEASE CHOOSE		0	0	127.041	441.116	1671.6
age in years	23			PLEASE CHOOSE		0	0	127.041	441.116	1671.6
				PLEASE CHOOSE		0	0	127.041	441.116	1671.6
estimated BAC				PLEASE CHOOSE		0	0	127.041	441.116	1671.6
max. BAC	2			PLEASE CHOOSE		0	0	127.041	441.116	1671.6
realistic BAC on an empty stomach (assumed resorption deficit of 20%, even though 40-60 % would be more likely on a full stomach) maximum will be reached about 60 min. after end of consumption (if consumed within 30 min, or less)	1.6			PLEASE CHOOSE		0	0	127.041	441.116	1671.6
				PLEASE CHOOSE		0	0	127.041	441.116	1671.6
Your results (please don't manipulate)				PLEASE CHOOSE		0	0	127.041	441.116	1671.6
estimated total body water in l	48.1673			PLEASE CHOOSE		0	0	127.041	441.116	1671.6
required alcohol in gr	127.041			PLEASE CHOOSE		0	0	127.041	441.116	1671.6
ml BRANDY (36 Vol %) needed OR	441.116	stretch the amount over at least 2 h for safety!		PLEASE CHOOSE		0	0	127.041	441.116	1671.6
ml red wine (9,5 Vol %) needed	1671.6			PLEASE CHOOSE		0	0	127.041	441.116	1671.6
				PLEASE CHOOSE		0	0	127.041	441.116	1671.6
				PLEASE CHOOSE		0	0	127.041	441.116	1671.6
				PLEASE CHOOSE		0	0	127.041	441.116	1671.6
				PLEASE CHOOSE		0	0	127.041	441.116	1671.6
